# Supplementary material
Source: publisher site journal article supplement (https://static.cambridge.org/content/id/urn:cambridge.org:id:article:S0008347X18000640/resource/name/S0008347X18000640supp001.pdf)

Supplementary Figure 1. Field trapping schematic.

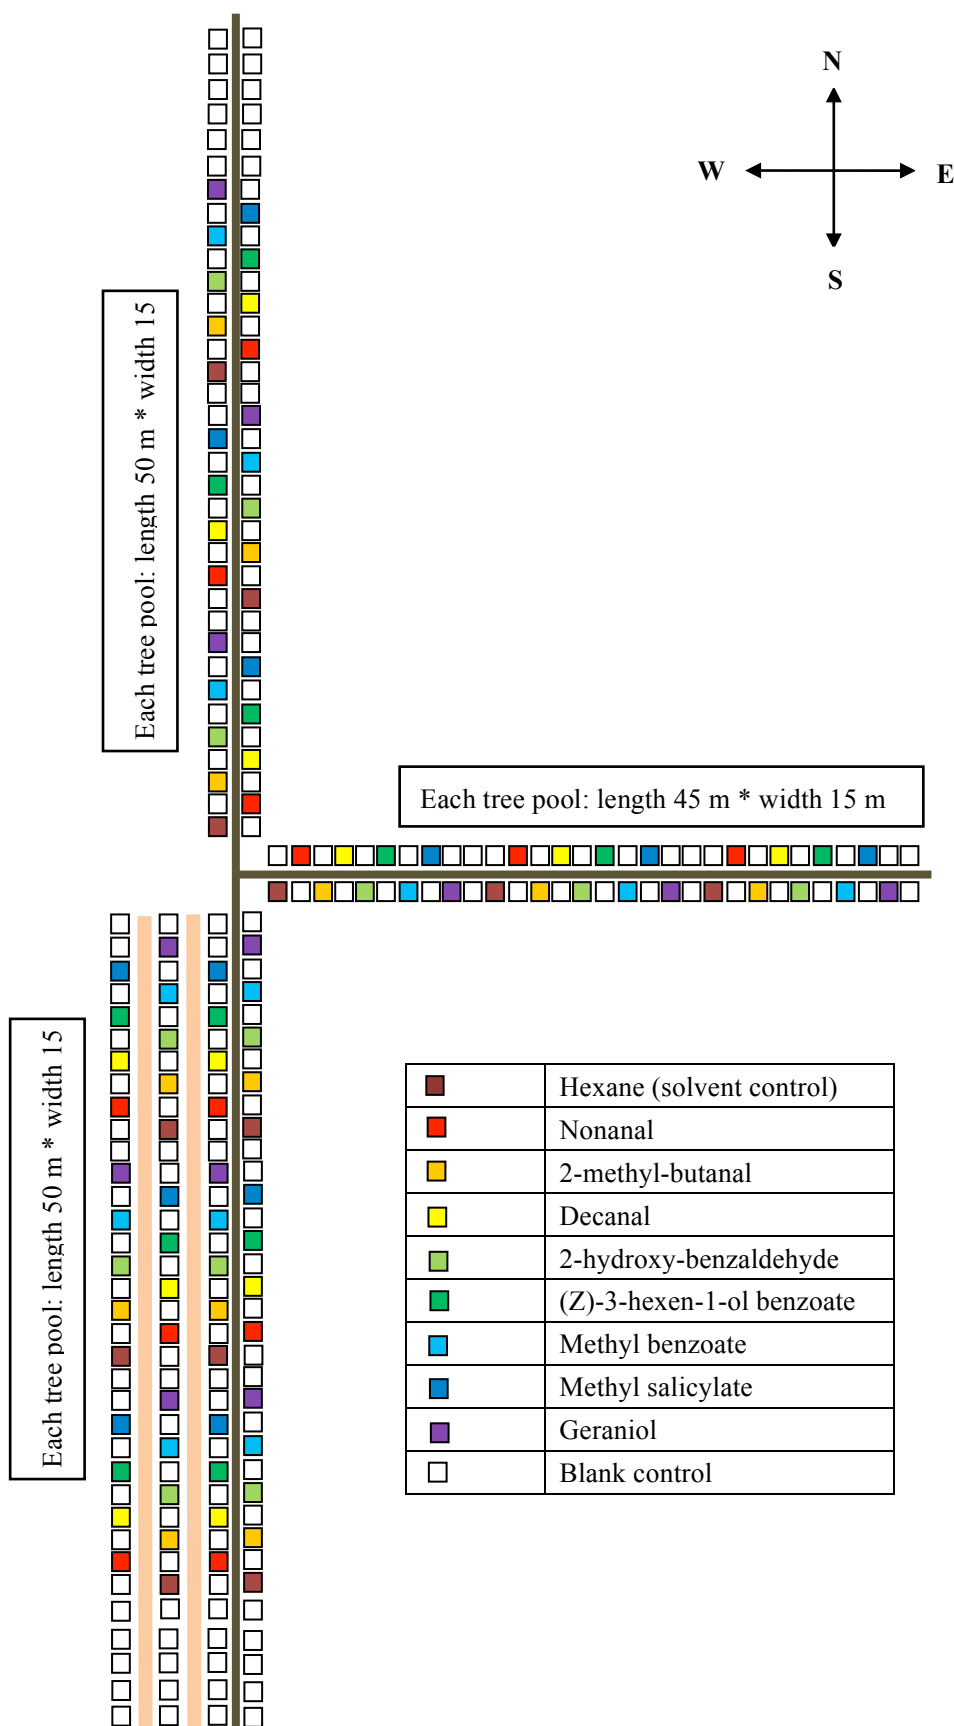

Supplement: Supplementary file 1 [file S0008347X18000640supp001.pdf]
